# Supplementary material
Source: PubMed Central journal article supplement (PMC10753441)
Supplement: jamapsychiatry-e234912-s001.pdf [file jamapsychiatry-e234912-s001.pdf]

## Supplemental Online Content

Meng L-C, Lin C-W, Chuang H-M, Chen L-K, Hsiao F-Y. Benzodiazepine use during pregnancy and risk of miscarriage. *JAMA Psychiatry*. Published online December 27, 2023. doi:10.1001/jamapsychiatry.2023.4912

**eFigure 1.** Flow chart of study population selection

**eFigure 2.** Algorithms for miscarriage definition

**eTable 1.** Data sources

**eTable 2.** Definitions of covariates using for the disease risk score calculation

**eTable 3.** Study outcome: ICD codes and specific reimbursement codes

**eTable 4.** Study medication category and ATC codes

**eTable 5.** Characteristics of cases and controls before matched

**eTable 6.** Characteristics of cases between risk period and reference period (31-58 days before the LMP)

**eTable 7.** Characteristics of cases between risk period and reference period (181-208 days before the LMP)

**eTable 8.** Association between pregnancy benzodiazepine use and the risk of miscarriage: case-time-control design

**eTable 9.** Association between pregnancy benzodiazepine use and the risk of miscarriage: subgroup analyses

**eTable 10.** Association between pregnancy benzodiazepine use and the risk of miscarriage: sensitivity analyses

**eTable 11.** Calculating the E-value to assess the impact of unmeasured confounders

This supplemental material has been provided by the authors to give readers additional information about their work.

eFigure 1. Flow chart of study population selection

### Pregnancies resulting in miscarriage

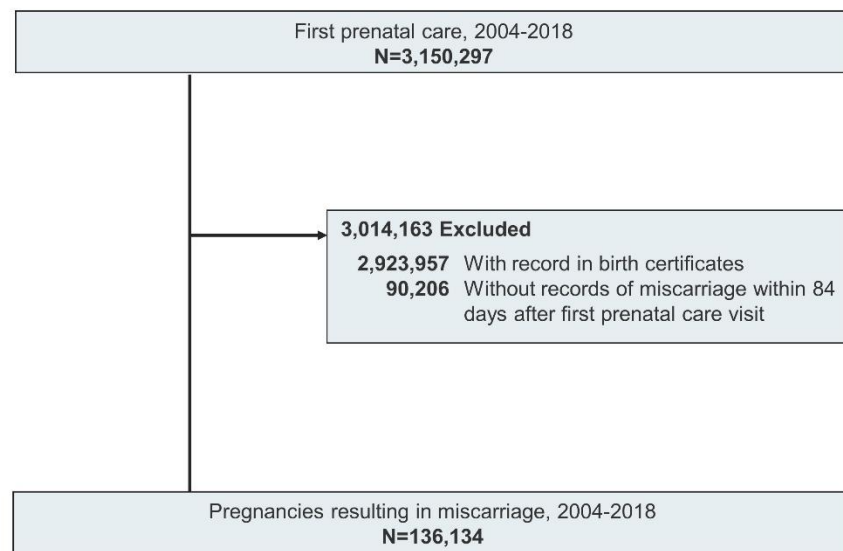

### Pregnancies resulting in births

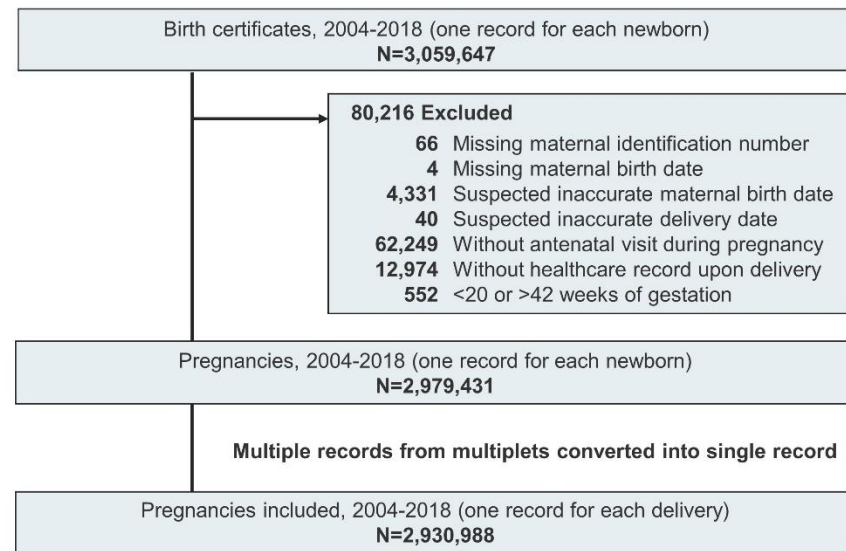

eFigure 2. Algorithms for miscarriage definition

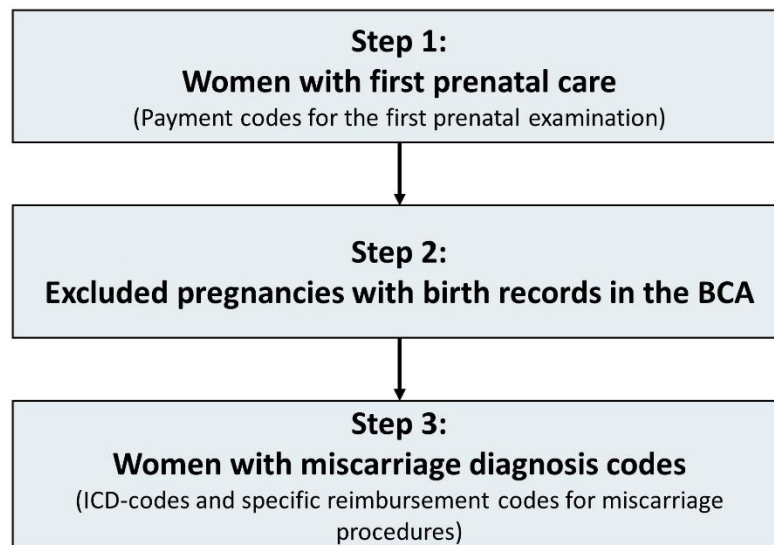

For miscarriage cases, we utilized a robust algorithm, informed by clinical insights from obstetricians, to define them in our study.

**Step 1: Women with first prenatal care**

In Taiwan, every pregnant woman is entitled to ten free prenatal examinations paid for by the government (1): two in the first trimester, two in the second trimester, and four in the third trimester. A very high proportion of Taiwanese pregnant women thus undergo examinations according to the government-provided schedule. In our approach to defining those with miscarriage, we used the payment code for the first prenatal examination for initial identification.

**Step 2: Excluded pregnancies with birth records in the BCA**

In step 2, we excluded pregnancies with birth records in the BCA. In Taiwan, birth registration within seven days of delivery is mandatory. This approach ensures that there are no live births or stillbirths ( $\geq 20$  weeks of gestational age) in those with miscarriage.

**Step 3: Women with miscarriage diagnosis codes**

Finally, we used diagnosis codes for identification of miscarriage, which, according to previous studies using other databases, have a high positive predictive value (PPV) for identifying miscarriages.

**Reference:**

1. Maternal Health Education Handbook. Health Promotion Administration, Ministry of Health and Welfare, Taiwan. <https://health99.hpa.gov.tw/material/6852>. Accessed 9, September, 2023.

eTable 1. Data sources

| <b>National Birth Certificate Application (BCA) database from 2004 to 2018</b>                                                                                                                                                                                                                                                                                                                                                                                                                                                                                                                                                                                                                                                                                                                                                                                                                                       |
|----------------------------------------------------------------------------------------------------------------------------------------------------------------------------------------------------------------------------------------------------------------------------------------------------------------------------------------------------------------------------------------------------------------------------------------------------------------------------------------------------------------------------------------------------------------------------------------------------------------------------------------------------------------------------------------------------------------------------------------------------------------------------------------------------------------------------------------------------------------------------------------------------------------------|
| <p>The BCA records all live births and stillbirths with gestational age of more than 20 weeks or birth weight more than 500 grams. In Taiwan, birth registration within seven days of delivery is mandatory. A validation study of the BCA database reported a low percentage of missing information and high levels of validity and reliability of documented birth-related information. The data on each pregnancy and delivery are provided by obstetricians, and information for newborns is provided by pediatricians. Data in the BCA database include demographic characteristics, gestational age in weeks, birth date of newborns, singleton or multiple pregnancy, and birth outcomes.</p>                                                                                                                                                                                                                 |
| <b>National Health Insurance (NHI) database from 2002 to 2019</b>                                                                                                                                                                                                                                                                                                                                                                                                                                                                                                                                                                                                                                                                                                                                                                                                                                                    |
| <p>The NHI database comprises anonymized health insurance claims for visits, procedures, and prescriptions for more than 99% of the population in Taiwan (~23 million). For each healthcare encounter, the following information was recorded: dates of outpatient visits, admissions, and discharges; type of medical care (outpatient or inpatient visits); prenatal care (e.g., for each pregnant woman, ten routine prenatal care visits are provided free of charge: two visits during the first trimester, two visits during the second trimester, and six visits during the third trimester); prescription medications dispensed designated by World Health Organization (WHO) Anatomical Therapeutic Chemical codes; and diagnostic codes according to the International Classification of Diseases, 9th Edition (ICD-9 CM) for those before 2016, or the 10th edition (ICD-10 CM) for those since 2016.</p> |

eTable 2. Definitions of covariates using for the disease risk score calculation

| Co-morbidities                                          | ICD9-CODE                                                                      | ICD10- Code                                                   |
|---------------------------------------------------------|--------------------------------------------------------------------------------|---------------------------------------------------------------|
| <b>Sleep disorder or psychiatric medical conditions</b> |                                                                                |                                                               |
| Anxiety                                                 | 300.0x, 300.2x, 300.3x, 309.81                                                 | F40.xx-F43.xx                                                 |
| Insomnia                                                | 307.31,307.42, 309.49, 780.51, 780.52                                          | G47.xx, F51.xx                                                |
| Depression                                              | 296.2x, 296.3x, 311.xx, 300.4x                                                 | F32.xx-F34.xx                                                 |
| Schizophrenia                                           | 295.xx                                                                         | F20.xx, F21.xx, F25.xx                                        |
| Epilepsy                                                | 345.xx                                                                         | G40.xx                                                        |
| Bipolar disorder                                        | 296.0x, 296.1x, 296.4x-296.8x                                                  | F30.xx, F31.xx                                                |
| <b>Life style factors</b>                               |                                                                                |                                                               |
| Overweight/Obesity                                      | 278.0x                                                                         | E66.xx                                                        |
| Tobacco use                                             | 305.1x                                                                         | F172.xx                                                       |
| Alcohol abuse                                           | 291.xx, 303.xx, 305.0x                                                         | F10.xx                                                        |
| Drug abuse                                              | 304.xx, 305.2x–305.9x, 648.3x                                                  | F11.xx-F16.xx, F18.xx, F19.xx                                 |
| <b>Chronic comorbidities</b>                            |                                                                                |                                                               |
| Hypertension                                            | 401.xx–405.xx                                                                  | I10.xx-I13.xx, I15.xx                                         |
| Hyperlipidemia                                          | 272.0x-272.4x, 272.9x                                                          | E78.0x-E78.5x                                                 |
| Diabetes mellitus                                       | 250.xx                                                                         | E10.xx-E14.xx                                                 |
| Chronic congestive heart failure                        | 402.01, 402.11, 402.91, 404.01, 404.03, 404.11, 404.13, 404.91, 404.93, 428.xx | I11.0x, I13.0x,I13.2x,I50.xx                                  |
| Chronic ischemic heart disease                          | 412.xx–414.xx                                                                  | I20.xx, I25.xx                                                |
| Congenital heart disease                                | 745.0x–747.4x, 648.5x                                                          | Q20.xx-Q26.xx, O99.4x                                         |
| Cardiac valvular disease                                | 394.xx–397.xx, 424.xx                                                          | I05.xx-I09.xx, I34.xx-I39.xx                                  |
| Asthma                                                  | 493.xx                                                                         | J44.xx, J45.xx                                                |
| Hyperthyroidism                                         | 242.xx                                                                         | E05.xx                                                        |
| Chronic renal disease                                   | 581.xx–583.xx, 585.xx, 587.xx, 588.xx                                          | N02.2x, N03.xx-N05.xx, N08.xx, N17.1x, N17.2x, N18.xx, N25.xx |
| Human immunodeficiency virus                            | 42.xx, V08.xx                                                                  | B20.xx, B24.xx, O98.7x, Z21.xx, Z22.6x                        |
| Sickle cell disease                                     | 282.4x, 282.6x                                                                 | D56.xx, D57.xx                                                |
| Systemic lupus erythematosus                            | 710.0x                                                                         | M32.xx                                                        |

eTable 3. Study outcome: ICD codes and specific reimbursement codes

The rationale for using a broader range of codes to define miscarriage is twofold. First, the codes we utilized were recommended by obstetricians. In Taiwan, the government funds ten free prenatal examinations, providing pregnant women with more opportunities to receive medical care and examinations. Consequently, if there are any indications (even suspicious sign such as 640 Hemorrhage in early pregnancy) of a miscarriage, the diagnostic codes we used are likely to be given. Second, we aimed to include all potential cases from the beginning. Since we can only define miscarriages from around 8 weeks of gestation until week 20, a timeframe during which more than half of all miscarriages have already occurred, we sought to include a larger study population to mitigate the reduced statistical power associated with a small sample size.

| Miscarriage                          | Description                                                                           |
|--------------------------------------|---------------------------------------------------------------------------------------|
| <b>ICD codes</b>                     | ICD-9-CM: 631.xx, 632.xx, 634.xx, 637.xx, 640.xx<br>ICD-10-CM: O02.xx, O03.xx, O20.xx |
| <b>Reimbursement codes in Taiwan</b> | 81001C: Removal of hydatidiform mole                                                  |
|                                      | 81006C: D&C ( $\leq$ 12.week)                                                         |
|                                      | 81007C: D&C (>12.week)                                                                |
|                                      | 81007CA: Septic abortion treatment                                                    |
|                                      | 81008B: Abortion, therapeutic transabdominal                                          |
|                                      | 81009C: Medical induction for fetal death                                             |
|                                      | 81010C: Medical induction for fetal death                                             |
|                                      | 81012B: Destruction of the dead fetus                                                 |
|                                      | 81022B: Septic abortion treatment                                                     |
|                                      | 81030C: Dilution and evacuation after induction failure                               |

eTable 4. Study medication category and ATC codes

| <b>Medication Category</b>                           | <b>Agents</b>    | <b>ATC Codes</b> |
|------------------------------------------------------|------------------|------------------|
| Long-acting<br>benzodiazepines<br>(half-life >24 h)  | Clonazepam       | N03AE01          |
|                                                      | Diazepam         | N05BA01          |
|                                                      | Chlordiazepoxide | N05BA02          |
|                                                      | Medazepam        | N05BA03          |
|                                                      | Bromazepam       | N05BA08          |
|                                                      | Clobazam         | N05BA09          |
|                                                      | Prazepam         | N05BA11          |
|                                                      | Nordazepam       | N05BA16          |
|                                                      | Cloxazolam       | N05BA22          |
|                                                      | Oxazolam         | N05BA91          |
|                                                      | Nitrazepam       | N05CD02          |
|                                                      | Flunitrazepam    | N05CD03          |
|                                                      | Brotizolam       | N05CD09          |
| Short-acting<br>benzodiazepines<br>(half-life ≤24 h) | Oxazepam         | N05BA04          |
|                                                      | Clorazepate      | N05BA05          |
|                                                      | Lorazepam        | N05BA06          |
|                                                      | Alprazolam       | N05BA12          |
|                                                      | Fludiazepam      | N05BA17          |
|                                                      | Flurazepam       | N05CD01          |
|                                                      | Estazolam        | N05CD04          |
|                                                      | Triazolam        | N05CD05          |
|                                                      | Lormetazepam     | N05CD06          |
|                                                      | Temazepam        | N05CD07          |
|                                                      | Midazolam        | N05CD08          |
| Nimetazepam                                          | N05CD15          |                  |



eTable 5. Characteristics of cases and controls before matched

|                                       | Case, N (%)  | Control, N (%) | Standardized difference |
|---------------------------------------|--------------|----------------|-------------------------|
| <b>Total</b>                          | 136,134      | 2,930,988      |                         |
| <b>Age at pregnancy, mean (SD)</b>    | 30.61 (5.91) | 29.94 (4.95)   | 0.1236                  |
| <b>Psychiatric medical conditions</b> |              |                |                         |
| Anxiety                               | 1,439 (1.06) | 19,576 (0.67)  | 0.0421                  |
| Insomnia                              | 1,774 (1.30) | 19,869 (0.68)  | 0.0632                  |
| Depression                            | 1,247 (0.92) | 12,954 (0.44)  | 0.0577                  |
| Schizophrenia                         | 111 (0.08)   | 1,199 (0.04)   | 0.0164                  |
| Epilepsy                              | 153 (0.11)   | 2,806 (0.10)   | 0.0052                  |
| Bipolar                               | 161 (0.12)   | 1,519 (0.05)   | 0.0228                  |
| <b>Lifestyle factors</b>              |              |                |                         |
| Obesity                               | 102 (0.07)   | 2,164 (0.07)   | 0.0004                  |
| Tobacco use                           | 92 (0.07)    | 1,548 (0.05)   | 0.0060                  |
| Alcohol use                           | 35 (0.03)    | 386 (0.01)     | 0.0090                  |
| Drug abuse                            | 22 (0.02)    | 539 (0.02)     | -0.0017                 |
| <b>Chronic comorbidities</b>          |              |                |                         |
| Hypertension                          | 652 (0.48)   | 15,252 (0.52)  | -0.0059                 |
| Hyperlipidemia                        | 470 (0.35)   | 6,120 (0.21)   | 0.0260                  |
| Diabetes mellitus                     | 574 (0.42)   | 17,303 (0.59)  | -0.0238                 |
| Chronic congestive heart failure      | 24 (0.02)    | 447 (0.02)     | 0.0019                  |
| Chronic ischemic heart disease        | 70 (0.05)    | 1,268 (0.04)   | 0.0038                  |
| Congenital heart disease              | 73 (0.05)    | 18,398 (0.63)  | -0.0986                 |
| Cardiac valvular disease              | 198 (0.15)   | 8,959 (0.31)   | -0.0338                 |
| Asthma                                | 600 (0.44)   | 20,882 (0.71)  | -0.0359                 |
| Hyperthyroidism                       | 741 (0.54)   | 22,824 (0.78)  | -0.0289                 |
| Chronic renal disease                 | 130 (0.10)   | 4,432 (0.15)   | -0.0159                 |
| Human immunodeficiency virus          | 7 (0.01)     | 970 (0.03)     | -0.0202                 |
| Sickle cell disease                   | 67 (0.05)    | 11,229 (0.38)  | -0.0719                 |
| Systemic lupus erythematosus          | 231 (0.17)   | 3,687 (0.13)   | 0.0114                  |
| <b>Medication use</b>                 |              |                |                         |
| Antidepressants                       | 3544 (2.6)   | 41,540 (1.42)  | 0.0846                  |
| Opioid analgesics                     | 2,705 (1.99) | 39,899 (1.36)  | 0.0488                  |
| Anticonvulsants                       | 896 (0.66)   | 12,643 (0.43)  | 0.0308                  |
| Z-hypnotics                           | 5303 (3.90)  | 4696 (0.16)    | 0.2674                  |
| Other anxiolytics                     | 4,958 (3.64) | 80,842 (2.76)  | 0.0502                  |

|                               |                |                   |        |
|-------------------------------|----------------|-------------------|--------|
| Antipsychotics                | 2,083 (1.53)   | 27,004 (0.92)     | 0.0553 |
| Antihypertensive drug         | 146 (0.11)     | 2,582 (0.09)      | 0.0061 |
| Anti-diabetic drug            | 1,118 (0.82)   | 16,336 (0.56)     | 0.0319 |
| Lipid modifying agents        | 502 (0.37)     | 5,510 (0.19)      | 0.0343 |
| <b>Healthcare utilization</b> |                |                   |        |
| Outpatient visits, >5         | 56,807 (41.73) | 1,105,506 (37.72) | 0.0820 |
| Inpatient visits, >1          | 5,838 (4.29)   | 6,412 (0.22)      | 0.2768 |

eTable 6. Characteristics of cases between risk period and reference period (31-58 days before the LMP)

|                                       | Risk period<br>(N=134,864) | Reference period<br>(N=134,864) | SD      |
|---------------------------------------|----------------------------|---------------------------------|---------|
| <b>Psychiatric medical conditions</b> |                            |                                 |         |
| Anxiety                               | 720 (0.53)                 | 922 (0.68)                      | -0.0193 |
| Insomnia                              | 938 (0.70)                 | 1148 (0.85)                     | -0.0178 |
| Depression                            | 534 (0.40)                 | 747 (0.55)                      | -0.0230 |
| Schizophrenia                         | 83 (0.06)                  | 76 (0.06)                       | 0.0021  |
| Epilepsy                              | 101 (0.07)                 | 71 (0.05)                       | 0.0088  |
| Bipolar                               | 83 (0.06)                  | 104 (0.08)                      | -0.0059 |
| <b>Lifestyle factors</b>              |                            |                                 |         |
| Obesity                               | 53 (0.04)                  | 57 (0.04)                       | -0.0015 |
| Tobacco use                           | 78 (0.06)                  | 50 (0.04)                       | 0.0095  |
| Alcohol use                           | 25 (0.02)                  | 35 (0.03)                       | -0.0050 |
| Drug abuse                            | 21 (0.02)                  | 26 (0.02)                       | -0.0028 |
| <b>Chronic comorbidities</b>          |                            |                                 |         |
| Hypertension                          | 699 (0.52)                 | 342 (0.25)                      | 0.0427  |
| Hyperlipidemia                        | 280 (0.21)                 | 299 (0.22)                      | -0.0030 |
| Diabetes mellitus                     | 676 (0.50)                 | 328 (0.24)                      | 0.0424  |
| Chronic congestive heart failure      | 11 (0.01)                  | 10 (0.01)                       | 0.0008  |
| Chronic ischemic heart disease        | 36 (0.03)                  | 51 (0.04)                       | -0.0062 |
| Congenital heart disease              | 54 (0.04)                  | 26 (0.02)                       | 0.0121  |
| Cardiac valvular disease              | 162 (0.12)                 | 122 (0.09)                      | 0.0091  |
| Asthma                                | 292 (0.22)                 | 399 (0.30)                      | -0.0157 |
| Hyperthyroidism                       | 715 (0.53)                 | 393 (0.29)                      | 0.0373  |
| Chronic renal disease                 | 859 (0.64)                 | 98 (0.07)                       | 0.0950  |
| Human immunodeficiency virus          | 146 (0.11)                 | ≤3 (0.00)                       | 0.0456  |
| Sickle cell disease                   | 336 (0.25)                 | 28 (0.02)                       | 0.0622  |
| Systemic lupus erythematosus          | 222 (0.16)                 | 157 (0.12)                      | 0.0129  |
| <b>Medication use</b>                 |                            |                                 |         |
| Antidepressants                       | 1069 (0.79)                | 1475 (1.09)                     | -0.0311 |
| Opioid analgesics                     | 294 (0.22)                 | 452 (0.34)                      | -0.0223 |
| Anticonvulsants                       | 322 (0.24)                 | 371 (0.28)                      | -0.0072 |
| Z-hypnotics                           | 1064 (0.79)                | 1321 (0.98)                     | -0.0204 |
| Other anxiolytics                     | 487 (0.36)                 | 1055 (0.78)                     | -0.0559 |
| Antipsychotics                        | 581 (0.43)                 | 652 (0.48)                      | -0.0078 |

|                        |            |            |         |
|------------------------|------------|------------|---------|
| Antihypertensive drug  | 263 (0.20) | 70 (0.05)  | 0.0408  |
| Anti-diabetic drug     | 631 (0.47) | 684 (0.51) | -0.0056 |
| Lipid modifying agents | 200 (0.15) | 306 (0.23) | -0.0182 |

eTable 7. Characteristics of cases between risk period and reference period (181-208 days before the LMP)

|                                       | Risk period<br>(N=134,864) | Reference period<br>(N=134,864) | SD      |
|---------------------------------------|----------------------------|---------------------------------|---------|
| <b>Psychiatric medical conditions</b> |                            |                                 |         |
| Anxiety                               | 720 (0.53)                 | 869 (0.64)                      | -0.0144 |
| Insomnia                              | 938 (0.70)                 | 1021 (0.76)                     | -0.0072 |
| Depression                            | 534 (0.40)                 | 694 (0.51)                      | -0.0176 |
| Schizophrenia                         | 83 (0.06)                  | 71 (0.05)                       | 0.0037  |
| Epilepsy                              | 101 (0.07)                 | 75 (0.06)                       | 0.0075  |
| Bipolar                               | 83 (0.06)                  | 110 (0.08)                      | -0.0075 |
| <b>Lifestyle factors</b>              |                            |                                 |         |
| Obesity                               | 53 (0.04)                  | 46 (0.03)                       | 0.0027  |
| Tobacco use                           | 78 (0.06)                  | 61 (0.05)                       | 0.0056  |
| Alcohol use                           | 25 (0.02)                  | 22 (0.02)                       | 0.0017  |
| Drug abuse                            | 21 (0.02)                  | 24 (0.02)                       | -0.0017 |
| <b>Chronic comorbidities</b>          |                            |                                 |         |
| Hypertension                          | 699 (0.52)                 | 353 (0.26)                      | 0.0412  |
| Hyperlipidemia                        | 280 (0.21)                 | 252 (0.19)                      | 0.0047  |
| Diabetes mellitus                     | 676 (0.50)                 | 318 (0.24)                      | 0.0438  |
| Chronic congestive heart failure      | 11 (0.01)                  | 7 (0.01)                        | 0.0036  |
| Chronic ischemic heart disease        | 36 (0.03)                  | 47 (0.03)                       | -0.0047 |
| Congenital heart disease              | 54 (0.04)                  | 36 (0.03)                       | 0.0073  |
| Cardiac valvular disease              | 162 (0.12)                 | 114 (0.08)                      | 0.0111  |
| Asthma                                | 292 (0.22)                 | 346 (0.26)                      | -0.0082 |
| Hyperthyroidism                       | 715 (0.53)                 | 371 (0.28)                      | 0.0403  |
| Chronic renal disease                 | 859 (0.64)                 | 80 (0.06)                       | 0.0982  |
| Human immunodeficiency virus          | 146 (0.11)                 | ≤3 (0.00)                       | 0.0451  |
| Sickle cell disease                   | 336 (0.25)                 | 33 (0.02)                       | 0.0608  |
| Systemic lupus erythematosus          | 222 (0.16)                 | 162 (0.12)                      | 0.0118  |
| <b>Medication use</b>                 |                            |                                 |         |
| Antidepressants                       | 1069 (0.79)                | 1412 (1.05)                     | -0.0266 |
| Opioid analgesics                     | 294 (0.22)                 | 550 (0.41)                      | -0.0340 |
| Anticonvulsants                       | 322 (0.24)                 | 398 (0.30)                      | -0.0109 |
| Z-hypnotics                           | 1064 (0.79)                | 1261 (0.94)                     | -0.0158 |
| Other anxiolytics                     | 487 (0.36)                 | 1001 (0.74)                     | -0.0515 |
| Antipsychotics                        | 581 (0.43)                 | 677 (0.50)                      | -0.0104 |

|                        |            |            |         |
|------------------------|------------|------------|---------|
| Antihypertensive drug  | 263 (0.20) | 73 (0.05)  | 0.0399  |
| Anti-diabetic drug     | 631 (0.47) | 582 (0.43) | 0.0054  |
| Lipid modifying agents | 200 (0.15) | 273 (0.20) | -0.0129 |

eTable 8. Associations between pregnancy benzodiazepine use and the risk of miscarriage: case-time-control design

|                                    | Reference period: 31-58 days before the LMP |                                     |                    | Reference period: 181-208 days before the LMP |                                     |                    |
|------------------------------------|---------------------------------------------|-------------------------------------|--------------------|-----------------------------------------------|-------------------------------------|--------------------|
|                                    | Exposed to the risk period only             | Expose to the reference period only | Odds ratio (95%CI) | Exposed to the risk period only               | Expose to the reference period only | Odds ratio (95%CI) |
| <b>Overall benzodiazepine</b>      |                                             |                                     |                    |                                               |                                     |                    |
| CCO cases                          | 1,307                                       | 2,778                               | 0.47 (0.44-0.50)   | 1,502                                         | 2,806                               | 0.54 (0.50-0.57)   |
| CCO controls                       | 623                                         | 2,490                               | 0.25 (0.23-0.27)   | 753                                           | 2,386                               | 0.32 (0.29-0.34)   |
| CTC ratio                          | -                                           | -                                   | 1.88 (1.70-2.08)   | -                                             | -                                   | 1.69 (1.52-1.87)   |
| <b>Long-acting benzodiazepine</b>  |                                             |                                     |                    |                                               |                                     |                    |
| CCO cases                          | 581                                         | 1,329                               | 0.44 (0.40-0.48)   | 677                                           | 1,358                               | 0.50 (0.46-0.55)   |
| CCO controls                       | 276                                         | 1,217                               | 0.23 (0.20-0.27)   | 354                                           | 1,202                               | 0.30 (0.26-0.33)   |
| CTC ratio                          | -                                           | -                                   | 1.91 (1.60-2.28)   | -                                             | -                                   | 1.67 (1.44-1.93)   |
| <b>Short-acting benzodiazepine</b> |                                             |                                     |                    |                                               |                                     |                    |
| CCO cases                          | 937                                         | 1,834                               | 0.51 (0.47-0.55)   | 1,083                                         | 1,883                               | 0.58 (0.54-0.62)   |
| CCO controls                       | 452                                         | 1,610                               | 0.28 (0.25-0.31)   | 555                                           | 1,579                               | 0.35 (0.32-0.39)   |
| CTC ratio                          | -                                           | -                                   | 1.82 (1.59-2.08)   | -                                             | -                                   | 1.66 (1.47-1.87)   |

CCO=case crossover; CTC=case-time-control

eTable 9. Associations between pregnancy benzodiazepine use and the risk of miscarriage: subgroup analyses

|                                                  | Reference period: 31-58 days before the LMP |                                     |                    | Reference period: 181-208 days before the LMP |                                     |                    |
|--------------------------------------------------|---------------------------------------------|-------------------------------------|--------------------|-----------------------------------------------|-------------------------------------|--------------------|
|                                                  | Exposed to the risk period only             | Expose to the reference period only | Odds ratio (95%CI) | Exposed to the risk period only               | Expose to the reference period only | Odds ratio (95%CI) |
| <b>The five most commonly benzodiazepine use</b> |                                             |                                     |                    |                                               |                                     |                    |
| <b><i>Alprazolam</i></b>                         |                                             |                                     |                    |                                               |                                     |                    |
| CCO cases                                        | 424                                         | 801                                 | 0.53 (0.47-0.60)   | 499                                           | 871                                 | 0.57 (0.51-0.64)   |
| CCO controls                                     | 210                                         | 690                                 | 0.30 (0.26-0.36)   | 275                                           | 668                                 | 0.41 (0.36-0.47)   |
| CTC ratio                                        | -                                           | -                                   | 1.77 (1.44-2.17)   | -                                             | -                                   | 1.39 (1.17-1.66)   |
| <b><i>Diazepam</i></b>                           |                                             |                                     |                    |                                               |                                     |                    |
| CCO cases                                        | 228                                         | 536                                 | 0.43 (0.37-0.50)   | 242                                           | 553                                 | 0.44 (0.38-0.51)   |
| CCO controls                                     | 103                                         | 494                                 | 0.21 (0.17-0.26)   | 118                                           | 452                                 | 0.26 (0.21-0.32)   |
| CTC ratio                                        | -                                           | -                                   | 2.05 (1.58-2.66)   | -                                             | -                                   | 1.69 (1.31-2.19)   |
| <b><i>Lorazepam</i></b>                          |                                             |                                     |                    |                                               |                                     |                    |
| CCO cases                                        | 237                                         | 560                                 | 0.42 (0.36-0.49)   | 288                                           | 536                                 | 0.54 (0.47-0.62)   |
| CCO controls                                     | 150                                         | 478                                 | 0.31 (0.26-0.38)   | 179                                           | 466                                 | 0.38 (0.32-0.46)   |
| CTC ratio                                        | -                                           | -                                   | 1.35 (1.06-1.73)   | -                                             | -                                   | 1.42 (1.13-1.79)   |
| <b><i>Oxazolam</i></b>                           |                                             |                                     |                    |                                               |                                     |                    |
| CCO cases                                        | 136                                         | 353                                 | 0.39 (0.32-0.47)   | 149                                           | 346                                 | 0.43 (0.36-0.52)   |
| CCO controls                                     | 65                                          | 281                                 | 0.23 (0.18-0.30)   | 73                                            | 263                                 | 0.28 (0.32-0.36)   |
| CTC ratio                                        | -                                           | -                                   | 1.70 (1.23-2.33)   | -                                             | -                                   | 1.54 (1.27-1.86)   |
| <b><i>Fludiazepam</i></b>                        |                                             |                                     |                    |                                               |                                     |                    |
| CCO cases                                        | 242                                         | 334                                 | 0.73 (0.61-0.86)   | 261                                           | 358                                 | 0.73 (0.62-0.86)   |
| CCO controls                                     | 77                                          | 324                                 | 0.24 (0.19-0.31)   | 92                                            | 316                                 | 0.29 (0.23-0.37)   |
| CTC ratio                                        | -                                           | -                                   | 3.04 (2.26-4.10)   | -                                             | -                                   | 2.52 (1.89-3.36)   |



| <b>Dose analysis</b> |     |       |                  |       |       |                  |
|----------------------|-----|-------|------------------|-------|-------|------------------|
| CCO cases            |     |       |                  |       |       |                  |
| DDD<1.0              | 932 | 2,202 | 0.43 (0.40-0.47) | 1,090 | 2,195 | 0.50 (0.47-0.54) |
| 1.0≤DDD              | 375 | 576   | 0.61 (0.54-0.69) | 412   | 609   | 0.65 (0.58-0.73) |
| CCO controls         |     |       |                  |       |       |                  |
| DDD<1.0              | 482 | 1,979 | 0.24 (0.22-0.27) | 579   | 1,894 | 0.31 (0.28-0.34) |
| 1.0≤DDD              | 141 | 511   | 0.26 (0.22-0.31) | 174   | 492   | 0.35 (0.30-0.41) |
| CTC ratio            |     |       |                  |       |       |                  |
| DDD<1.0              | -   | -     | 1.79 (1.57-2.04) | -     | -     | 1.61 (1.43-1.82) |
| 1.0≤DDD              | -   | -     | 2.35 (1.90-2.90) | -     | -     | 1.86 (1.53-2.25) |

CCO=case crossover; CTC=case-time-control

eTable 10. Associations between pregnancy benzodiazepine use and the risk of miscarriage: sensitivity analyses

|                                                   | Reference period: 31-58 days before the LMP |                                     |                    | Reference period: 181-208 days before the LMP |                                     |                    |
|---------------------------------------------------|---------------------------------------------|-------------------------------------|--------------------|-----------------------------------------------|-------------------------------------|--------------------|
|                                                   | Exposed to the risk period only             | Expose to the reference period only | Odds ratio (95%CI) | Exposed to the risk period only               | Expose to the reference period only | Odds ratio (95%CI) |
| <b>Time window of 7 days</b>                      |                                             |                                     |                    |                                               |                                     |                    |
| CCO cases                                         | 687                                         | 1,426                               | 0.48 (0.44-0.53)   | 751                                           | 1,357                               | 0.55 (0.51-0.61)   |
| CCO controls                                      | 309                                         | 1,201                               | 0.26 (0.23-0.29)   | 319                                           | 1,197                               | 0.27 (0.24-0.30)   |
| CTC ratio                                         | -                                           | -                                   | 1.85 (1.59-2.14)   | -                                             | -                                   | 2.04 (1.77-2.35)   |
| <b>Time window of 14 days</b>                     |                                             |                                     |                    |                                               |                                     |                    |
| CCO cases                                         | 946                                         | 1,991                               | 0.48 (0.44-0.51)   | 1,058                                         | 1,993                               | 0.53 (0.49-0.57)   |
| CCO controls                                      | 401                                         | 1,777                               | 0.23 (0.20-0.25)   | 444                                           | 1,677                               | 0.27 (0.24-0.29)   |
| CTC ratio                                         | -                                           | -                                   | 2.09 (1.83-2.39)   | -                                             | -                                   | 1.96 (1.74-2.22)   |
| <b>Time window of 56 days</b>                     |                                             |                                     |                    |                                               |                                     |                    |
| CCO cases                                         | 2,247                                       | 3,903                               | 0.58 (0.55-0.61)   | 2,592                                         | 4,068                               | 0.64 (0.61-0.67)   |
| CCO controls                                      | 1,388                                       | 3,421                               | 0.41 (0.38-0.43)   | 1,627                                         | 3,261                               | 0.50 (0.48-0.53)   |
| CTC ratio                                         | -                                           | -                                   | 1.41 (1.31-1.53)   | -                                             | -                                   | 1.28 (1.20-1.37)   |
| <b>Exposure redefined as dispensing ≥ 14 days</b> |                                             |                                     |                    |                                               |                                     |                    |
| CCO cases                                         | 560                                         | 1,229                               | 0.46 (0.41-0.50)   | 719                                           | 1,357                               | 0.53 (0.48-0.58)   |
| CCO controls                                      | 331                                         | 1,065                               | 0.31 (0.28-0.35)   | 465                                           | 1,178                               | 0.40 (0.36-0.44)   |
| CTC ratio                                         | -                                           | -                                   | 1.48 (1.28-1.72)   | -                                             | -                                   | 1.33 (1.15-1.52)   |
| <b>≥2 prescription dispensed</b>                  |                                             |                                     |                    |                                               |                                     |                    |
| CCO cases                                         | 525                                         | 1,090                               | 0.29 (0.26-0.33)   | 418                                           | 1,051                               | 0.22 (0.20-0.25)   |
| CCO controls                                      | 223                                         | 891                                 | 0.11 (0.10-0.13)   | 161                                           | 830                                 | 0.08 (0.07-0.10)   |
| CTC ratio                                         |                                             |                                     | 2.54 (2.11-3.07)   |                                               |                                     | 2.67 (2.16-3.29)   |
| <b>≥2 diagnoses of miscarriage</b>                |                                             |                                     |                    |                                               |                                     |                    |

|                                               |       |       |                               |       |       |                               |
|-----------------------------------------------|-------|-------|-------------------------------|-------|-------|-------------------------------|
| CCO cases                                     | 756   | 1,808 | 0.42 (0.38-0.46)              | 891   | 1,839 | 0.49 (0.45-0.53)              |
| CCO controls                                  | 418   | 1,646 | 0.25 (0.23-0.28)              | 512   | 1,571 | 0.33 (0.30-0.36)              |
| CTC ratio                                     | -     | -     | 1.68 (1.46-1.93)              | -     | -     | 1.48 (1.31-1.68)              |
| <b>Redefined miscarriage</b>                  |       |       |                               |       |       |                               |
| CCO cases                                     | 728   | 1,735 | 0.42 (0.39-0.46)              | 836   | 1,797 | 0.47 (0.43-0.51)              |
| CCO controls                                  | 383   | 1,665 | 0.23 (0.21-0.26)              | 463   | 1,607 | 0.29 (0.26-0.32)              |
| CTC ratio                                     | -     | -     | 1.83 (1.60-2.09)              | -     | -     | 1.62 (1.42-1.85)              |
| <b>Adjusted for time-varying confounders*</b> |       |       |                               |       |       |                               |
| CCO cases                                     | 1,307 | 2,778 | 0.51 (0.48-0.55)              | 1,502 | 2,806 | 0.57 (0.53-0.60)              |
| CCO controls                                  | 623   | 2,490 | 0.28 (0.26-0.31)              | 753   | 2,386 | 0.36 (0.33-0.40)              |
| CTC ratio                                     | -     | -     | 1.82 (1.63-2.04)              | -     | -     | 1.58 (1.41-1.78)              |
| <b>Negative control: redefine risk period</b> |       |       |                               |       |       |                               |
| CCO cases                                     | 2,550 | 2,383 | 1.07 (1.01-1.13)              | 2,376 | 2,241 | 1.06 (1.00-1.12)              |
| CCO controls                                  | 2,140 | 1,906 | 1.12 (1.05-1.19)              | 1,893 | 1,785 | 1.06 (0.99-1.13)              |
| CTC ratio                                     | -     | -     | 0.96 (0.88-1.04) <sup>a</sup> | -     | -     | 1.00 (0.92-1.09) <sup>b</sup> |

CCO=case crossover; CTC=case-time-control

\*Adjustment for co-medication use (antidepressants, opioid analgesics, anticonvulsants, z-hypnotics, other anxiolytics)

<sup>a</sup>Risk period redefined as (LMP-31) to (LMP-58), and reference period remained as (LMP-181) to (LMP-208)

<sup>a</sup>Risk period redefined as (LMP-91) to (LMP-118), and reference period remained as (LMP-181) to (LMP-208)

eTable 11. Calculating the E-value to assess the impact of unmeasured confounders

To further evaluate the potential effects of residual or unmeasured confounders, we calculated the E-values. The E-value is defined as the minimum strength of association that an unmeasured confounder would need to have with both the treatment and the outcome, conditional on the measured covariates, to explain away an observed association.

|                        | OR   | 95% CI    | E-value for point estimate | E-value for 95% CI |
|------------------------|------|-----------|----------------------------|--------------------|
| Overall benzodiazepine | 1.69 | 1.52-1.87 | 2.77                       | 2.41               |

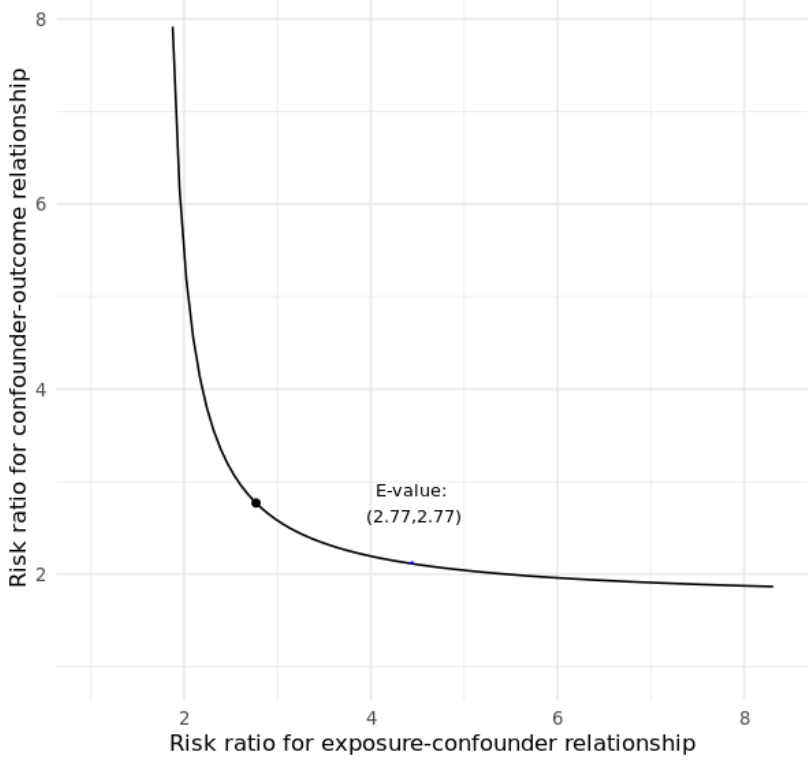

Each point along the curve defines a joint relationship between the two sensitivity parameters that could potentially explain away the estimated effect. If one of the two parameters is smaller than the E-value, the other must be larger, as defined by the plotted curve.

The E-value of 2.77 for the benzodiazepine association indicates that an unmeasured confounder would need to have an aOR of 2.77 or greater with both the exposure and outcome to fully explain away the observed association. The lower bound of the CI for the E-value, at 2.41, suggests that the statistical significance of our findings is not likely to be entirely attributable to unmeasured confounders.
