# Supplementary material
Source: PubMed Central journal article supplement (PMC10753441)
Supplement: jamapsychiatry-e234912-s002.pdf [file jamapsychiatry-e234912-s002.pdf]

## Data Sharing Statement

Meng. Benzodiazepine Use During Pregnancy and Risk of Miscarriage. *JAMA Psychiatry*.  
Published December 27, 2023. doi:10.1001/jamapsychiatry.2023.4912

### Data

**Data available:** No

### Additional Information

**Explanation for why data not available:** The Taiwan National Health Insurance Administration and Health and Welfare Data Science Center provided the birth certificate application and population health insurance data used in this study. All potentially identifying data were encrypted to protect anonymity. Only the investigator who receives approval of a proposal and signs a data access agreement can get access to data.
